# Supplementary material
Source: ML conference proceedings conference paper supplement (https://openreview.net/forum?id=WIrZh2XxLT)
Supplement: supplementary_material [file attachment]

**Algorithm 1** CMTA

---

**Initialize:** replay buffer  $D$  with  $\emptyset$   
**Initialize:** initial hidden state  $h_0$  with zero tensor  
**Initialize:** policy  $\pi$  with  $\phi$ , Q-function  $Q$ , task encoder  $g$ ,  $k$  experts  $f^1, \dots, f^k$ ,  $lstm$ , fully connected layer  $\mathcal{W}$   
**Input:** state  $s_t$  for each environment, one-hot task id  $z_\tau$

- 1: **for** episode  $m = 1, 2, \dots$  **do**
- 2:   **for** time-step  $t = 1, 2, \dots$  **do**
- 3:     **for** each task  $\tau_i$  **do**
- 4:        $z_{enc}^j = f^j(s_t), \forall j \in 1, \dots, k$
- 5:        $z_{task} = g(z_\tau)$
- 6:        $h_t = lstm(s_t; h_{t-1})$
- 7:        $\alpha_1, \dots, \alpha_k = softmax(\mathcal{W}(h_t; z_{task}))$
- 8:        $z_{enc} = \sum_{j=1}^k \alpha_j \cdot z_{enc}^j$
- 9:        $z = z_{task} || z_{enc}$
- 10:       sample action  $a_t \sim \pi(\cdot | z_{task}; z_{enc})$
- 11:       Perform action  $a_t$ , get reward  $r_t$  and next state  $s_{t+1}$ .
- 12:        $D = D \cup \{s_t, a_t, r_t, s_{t+1}, h_t, z_\tau\}$
- 13:     **end for**
- 14:     randomly sample batch from  $D$
- 15:     compute  $L_{contrastive}$  by Eq 3
- 16:     compute  $L_{actor}$  and  $L_{critic}$  by Eq9 and Eq10
- 17:     update  $k$  experts with  $L_{contrastive}$
- 18:     update  $\pi_\phi$  with  $L_{actor}$
- 19:     update all components except  $\pi_\phi$  with  $L_{critic}$
- 20:   **end for**
- 21: **end for**

---

423 **B Libraries**

424 We use the following open-source libraries: MetaWorld<sup>2</sup>, MTEnv<sup>3</sup>, MTRL<sup>4</sup>.

---

<sup>2</sup><https://github.com/rlworkgroup/metaworld>, commit-id:af8417bfc82a3e249b4b02156518d775f29eb289

<sup>3</sup><https://github.com/facebookresearch/mtenv>

<sup>4</sup><https://github.com/facebookresearch/mtrl>

## 425 C Additional Experiment Results

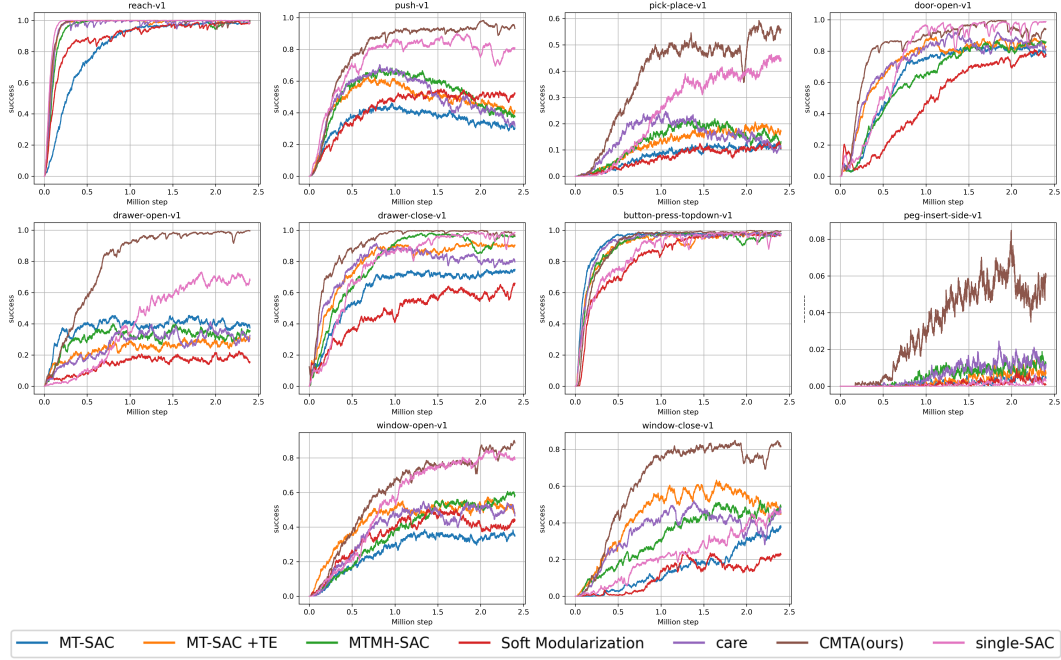

Figure 6: Training curves of different methods on each task of MT10-Mixed, each curve is averaged over 8 seeds. Our approach consistently outperforms baselines in all tasks, whether on asymptotic performance or sample efficiency.

## 426 D Hyperparameter Details.

Table 3: Hyperparameter values that are common across all the methods

| Hyperparameter                                    | Hyperparameter values                       |
|---------------------------------------------------|---------------------------------------------|
| batch size                                        | $128 \times \text{number of tasks}$         |
| network architecture                              | feedforward network                         |
| actor/critic size                                 | three fully connected layers with 512 units |
| non-linearity                                     | ReLU                                        |
| policy initialization                             | standard Gaussian                           |
| temperature                                       | learned and distangled with tasks           |
| exploration parameters                            | run a uniform exploration policy 1500 steps |
| num of samples / num of train steps per iteration | 1 env step / 1 training step                |
| evaluation frequency                              | 3000 steps                                  |
| replay buffer size                                | 5000000                                     |
| policy learning rate                              | $3e-4$                                      |
| Q function learning rate                          | $3e-4$                                      |
| optimizer                                         | Adam                                        |
| policy learning rate                              | $3e-4$                                      |
| beta for Adam optimizer for policy                | (0.9, 0.999)                                |
| Q function learning rate                          | $3e-4$                                      |
| beta for Adam optimizer for Q function            | (0.9, 0.999)                                |
| discount                                          | 0.99                                        |
| Episode length (horizon)                          | 150                                         |
| reward scale                                      | 1                                           |

Table 4: Hyperparameter values of task encoder

| Hyperparameter                  | Hyperparameter values                                             |
|---------------------------------|-------------------------------------------------------------------|
| task encoder train from scratch | embedding layer with dim 64 + FC 128 + FC 64 + FC 64              |
| pretrained                      | pre-trained embedding layer with dim 512 + FC 128 + FC 64 + FC 64 |

Table 5: Hyperparameter values of Soft Modularization

| Hyperparameter       | Hyperparameter values                        |
|----------------------|----------------------------------------------|
| task encoder type    | train from scratch                           |
| routing network size | 4 layers and 4 modules per layer with dim 64 |

Table 6: Hyperparameter values of CARE

| Hyperparameter     | Hyperparameter values       |
|--------------------|-----------------------------|
| task encoder type  | pre-trained embedding layer |
| encoder size       | FC 64 + FC 64               |
| number of encoders | 6                           |

Table 7: Hyperparameter values of CMTA

| Hyperparameter     | Hyperparameter values |
|--------------------|-----------------------|
| task encoder type  | train from scratch    |
| encoder size       | FC 64 + FC 64         |
| number of encoders | 6                     |
| $\beta$            | 2500                  |
